# Supplementary material for: Efficacy and Safety of Upadacitinib in Patients With Moderate to Severe Atopic Dermatitis: Analysis of Follow-up Data From the Measure Up 1 and Measure Up 2 Randomized Clinical Trials
Source: PubMed Central journal article supplement — JAMA Dermatol. 2022 Mar 9;158(4):404–13. doi: 10.1001/jamadermatol.2022.0029 (PMC8908226; doi:10.1001/jamadermatol.2022.0029), 2022-03-09
Supplement: jamadermatol-e220029-s002.pdf [file jamadermatol-e220029-s002.pdf]

## Data Sharing Statement

Simpson. Efficacy and Safety of Upadacitinib in Patients With Moderate to Severe Atopic Dermatitis. *JAMA Dermatol*. Published March 09, 2022. doi:10.1001/jamadermatol.2022.0029

### Data

**Data available:** No

### Additional Information

**Explanation for why data not available:** AbbVie is committed to responsible data sharing regarding the clinical trials we sponsor. This includes access to anonymized, individual, and trial-level data (analysis data sets), as well as other information (eg, protocols and clinical study reports), as long as the trials are not part of an ongoing or planned regulatory submission. This includes requests for clinical trial data for unlicensed products and indications. This clinical trial data can be requested by any qualified researchers who engage in rigorous, independent scientific research, and will be provided following review and approval of a research proposal and statistical analysis plan and execution of a data sharing agreement. Data requests can be submitted at any time and the data will be accessible for 12 months, with possible extensions considered. For more information on the process, or to submit a request, visit the following link: <https://www.abbvie.com/our-science/clinical-trials/clinical-trials-data-and-information-sharing/data-and-information-sharing-with-qualified-researchers.html>.
